# Supplementary material for: Increased Risk of Incident Chronic Kidney Disease, Cardiovascular Disease, and Mortality in Patients With Diabetes With Comorbid Depression
Source: Oxford University Press journal article supplement (doi:10.2337/dc16-0048), 2016-06-16

## SUPPLEMENTARY DATA

**Supplementary Figure S1.** Cohort definition flow chart.

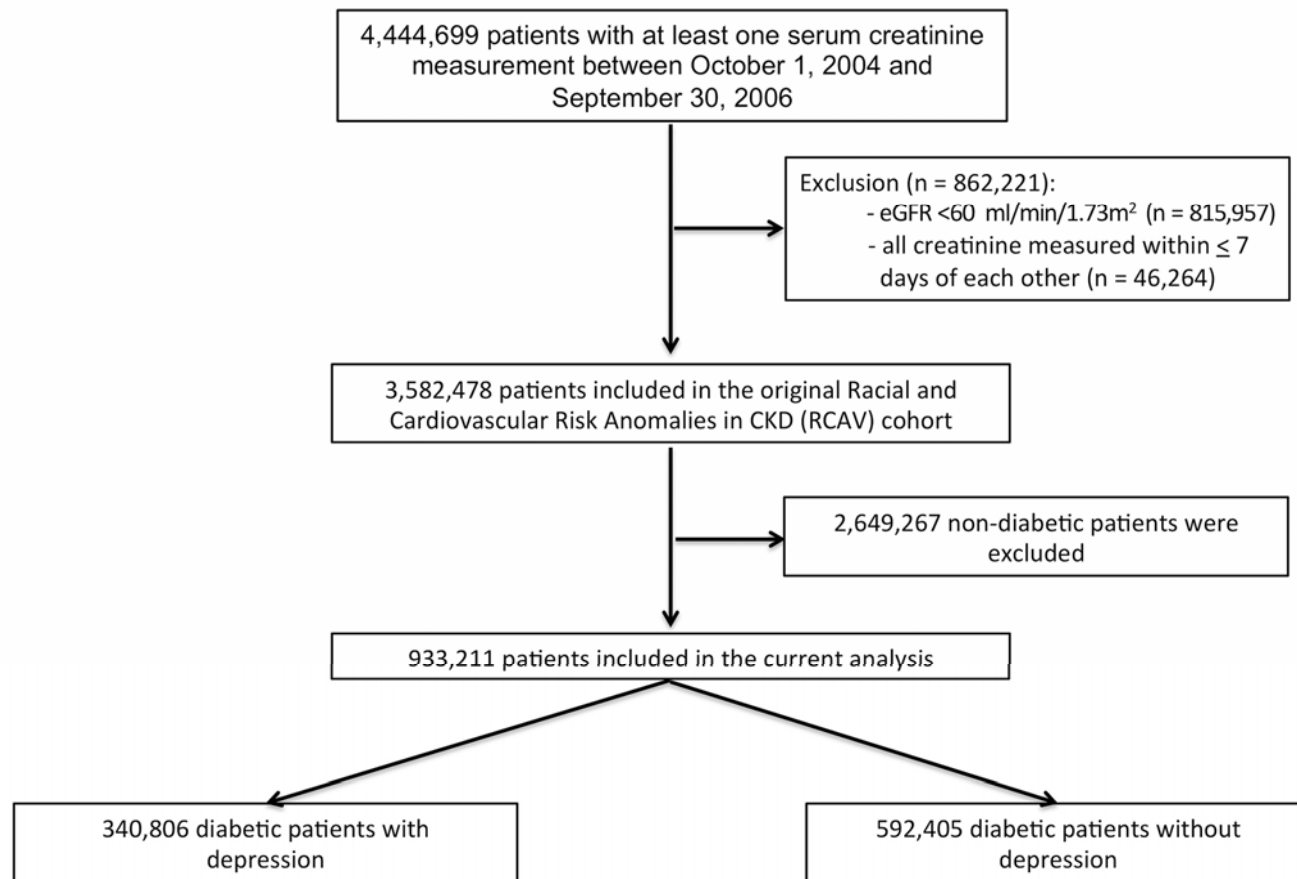

# SUPPLEMENTARY DATA

**Supplementary Table S1.** Baseline characteristics of study population grouped according to having developed incident CKD during the follow-up or not

|                                             | Total<br>population<br>(933,211) | Incident CKD<br>(n=180,343) | No incident<br>CKD<br>(n=750,325) |
|---------------------------------------------|----------------------------------|-----------------------------|-----------------------------------|
| Age (years)                                 | 64±11                            | 65±10                       | 63±11                             |
| Gender (male) n (%)                         | 901,958 (97)                     | 175,877 (98)                | 723,652(96)                       |
| Baseline eGFR (ml/min./1.73m <sup>2</sup> ) | 82±15                            | 78±13                       | 83±15                             |
| BMI (kg/m <sup>2</sup> )                    | 31±5                             | 31±5                        | 31±5                              |
| Serum albumin (g/L)                         | 40.2±4.5                         | 39.4±4.7                    | 40.4±4.4                          |
| Income (USD)                                | 23,389 (12,354-<br>34,263)       | 22,708 (12,635- 32,885)     | 23,586 (12,295-<br>34,820)        |
| <i>Race n (%):</i>                          |                                  |                             |                                   |
| White                                       | 663,394 (77)                     | 132,423 (77)                | 530,971 (77)                      |
| African-American                            | 152,954 (18)                     | 30,870 (18)                 | 122,084 (18)                      |
| Hispanic                                    | 25,441 (3)                       | 4,871 (3)                   | 20,570 (3)                        |
| Other Race                                  | 19,770 (2)                       | 3,511 (2)                   | 16,259 (2)                        |
| <i>Marital status:</i>                      |                                  |                             |                                   |
| Married                                     | 540,202 (60)                     | 100,468 (57)                | 439,734(61)                       |
| Single                                      | 67,645 (8)                       | 11,834 (7)                  | 55,811 (8)                        |
| Divorced                                    | 210,805 (23)                     | 42,396 (24)                 | 168,409 (23)                      |

# SUPPLEMENTARY DATA

|                                       |              |              |               |
|---------------------------------------|--------------|--------------|---------------|
| Widow                                 | 79,480 (9)   | 19,706 (11)  | 59,774 (8)    |
| Service connection                    | 400,064 (43) | 77,423 (43)  | 322,641 (43)  |
| <i>Comorbidities n (%):</i>           |              |              |               |
| Cardiovascular Disease                | 167,292 (18) | 44,964 (25)  | 122,328 (16)  |
| CHF                                   | 77,493 (8)   | 27,592 (15)  | 49,901 (7)    |
| Hypertension                          | 748,136 (80) | 161,656 (90) | 586,480 (78)  |
| Cerebrovascular Disease               | 82,809 (9)   | 22,509 (12)  | 60,300 (8)    |
| Peripheral Arterial Disease           | 87,418 (9)   | 26,777 (15)  | 60,641 (8)    |
| Chronic Lung Disease                  | 184,268 (19) | 41,497 (23)  | 142,771 (19)  |
| Dementia                              | 10,191 (1)   | 2,168 (1)    | 8,023(1)      |
| Rheumatologic Disease                 | 13,065 (1)   | 3,125 (2)    | 8,023 (1)     |
| Peptic Ulcer                          | 18,593 (2)   | 4,567 (3)    | 14,026 (2)    |
| Mild/Severe liver disease             | 15,235 (2)   | 3,738 (2)    | 11,497 (2)    |
| Hemiplegia                            | 4,995 (0.5)  | 1,115 (0.6)  | 3,880 (0.5)   |
| All malignancies                      | 107,451 (12) | 24,470 (14)  | 82,981 (11)   |
| AIDS/HIV                              | 3,462 (0.4)  | 920 (0.5)    | 2,542 (0.3)   |
| Post-Traumatic Stress Disorder (PTSD) | 96,804 (10)  | 19,633 (11)  | 77,171 (10)   |
| Statin use                            | 191,070 (21) | 41,285 (23)  | 149, 785 (20) |
| Anti-hypertensive medication use      | 516,384 (55) | 113,724 (63) | 402,660 (54)  |

Abbreviations: eGFR = estimated glomerular filtration rate; BMI = Body Mass Index; USD = US dollars; CHF = congestive heart failure;

# SUPPLEMENTARY DATA

**Supplementary Table S2. Predictors of Depression using logistic regression analysis**

|                                                                                                 | Odds Ratio | (95% confidence interval of Odds ratio) |
|-------------------------------------------------------------------------------------------------|------------|-----------------------------------------|
| <i>Age</i> (+10 year)                                                                           | 0.95       | (0.95 - 0.96)                           |
| <i>Gender</i> : female vs male (ref.)                                                           | 1.62       | (1.57 - 1.66)                           |
| <i>Race</i> :                                                                                   |            |                                         |
| White (ref.)                                                                                    | 1          | N/A                                     |
| African-American                                                                                | 0.7        | (0.69 - 0.71)                           |
| Hispanic                                                                                        | 1.01       | (0.98 - 1.03)                           |
| Other Race                                                                                      | 0.77       | (0.75 - 0.8)                            |
| <i>Income</i> (+1 log)                                                                          | 0.92       | (0.91 - 0.92)                           |
| <i>Unmarried</i> Yes vs NO                                                                      | 1.09       | (1.08 - 1.1)                            |
| <i>Baseline eGFR</i> (+10 ml/min./1.73m <sup>2</sup> )                                          | 1          | (1 - 1)                                 |
| <i>Presence of Cardiovascular Disease</i> vs absence of Cardiovascular Disease (ref.)           | 1.2        | (1.18 - 1.21)                           |
| <i>Presence of Congestive Heart Failure</i> vs absence of Congestive Heart Failure (ref.)       | 1.28       | (1.25 - 1.3)                            |
| <i>Presence of CVD</i> vs absence of CVD (ref.)                                                 | 1.45       | (1.42 - 1.47)                           |
| <i>Presence of Peripheral Arterial Disease</i> vs absence of Peripheral Arterial Disease (ref.) | 1.29       | (1.27 - 1.31)                           |
| <i>Presence of Chronic Lung Disease</i> vs absence of Chronic Lung Disease (ref.)               | 1.69       | (1.67 - 1.71)                           |
| <i>Presence of dementia</i> vs absence of dementia (ref.)                                       | 4.11       | (3.92 - 4.31)                           |
| <i>Presence of Rheumatologic Disease</i> vs absence of Rheumatologic Disease (ref.)             | 1.36       | (1.31 - 1.42)                           |
| <i>Presence of malignancy</i> vs absence of malignancy (ref.)                                   | 1.21       | (1.19 - 1.23)                           |

## SUPPLEMENTARY DATA

|                                                                   |      |               |
|-------------------------------------------------------------------|------|---------------|
| <i>Presence of AIDS/HIV</i> vs absence of AIDS/HIV (ref.)         | 1.39 | (1.29 - 1.5)  |
| <i>Presence of Hypertension</i> vs absence of Hypertension (ref.) | 1.18 | (1.17 - 1.2)  |
| <i>Body mass index</i> (+1 kg/m <sup>2</sup> )                    | 0.99 | (0.99 - 1)    |
| <i>Albumin</i> (+1 g/dl)                                          | 0.75 | (0.74 - 0.76) |

Abbreviations: eGFR = estimated glomerular filtration rate; CVD = cardiovascular disease;

## SUPPLEMENTARY DATA

**Supplementary Table S3.** Sensitivity analyses assessing the association between baseline depression and mortality, incident stroke and CHD separately in patients who maintained  $\text{eGFR} \geq 60 \text{ mL} \cdot \text{min}^{-1} \cdot 1.73 \text{ m}^{-2}$  versus in patients who developed incident CKD during the follow-up period.

| Outcome                         | Patients who maintained $\text{eGFR} \geq 60 \text{ mL} \cdot \text{min}^{-1} \cdot 1.73 \text{ m}^{-2}$ during the follow-up period<br>Hazard Ratio (95% CI) | Patients who developed incident CKD during the follow-up period<br>Hazard Ratio (95% CI) |
|---------------------------------|---------------------------------------------------------------------------------------------------------------------------------------------------------------|------------------------------------------------------------------------------------------|
| Mortality                       | 1.32 (1.31, 1.34)                                                                                                                                             | 1.15 (1.12, 1.17)                                                                        |
| Incident coronary heart disease | 1.21 (1.18, 1.25)                                                                                                                                             | 1.05 (1.01, 1.09)                                                                        |
| Incident stroke                 | 1.34 (1.29, 1.39)                                                                                                                                             | 1.20 (1.14, 1.26)                                                                        |

The models were adjusted for the following covariates: age, gender, race/ethnicity, marital status, baseline eGFR, comorbidities at baseline (hypertension, cardiovascular disease, congestive heart failure, cerebrovascular disease, peripheral vascular disease, lung disease, dementia, rheumatic disease, malignancy, HIV/AIDS and Post-Traumatic Stress Disorder) and the use of statins or anti-hypertensive medications, body mass index and serum albumin level.

**Abbreviations:** coronary heart disease = coronary heart disease; eGFR = estimated glomerular filtration rate; CKD = chronic kidney disease; CI = confidence interval

SUPPLEMENTARY DATA

**Supplementary Figure S2.** Multivariable adjusted associations between incident CKD and the presence of depression at baseline compared to those without depression in pre-defined subgroups of the study cohort. The models were adjusted for the following covariates: age, gender, race/ethnicity, marital status, baseline eGFR, comorbidities at baseline (hypertension, cardiovascular disease, congestive heart failure, cerebrovascular disease, peripheral vascular disease, lung disease, dementia, rheumatic disease, malignancy, HIV/AIDS and Post-Traumatic Stress Disorder) and the use of statins or anti-hypertensive medications, body mass index and serum albumin level. Abbreviations: AA = African American; yr = year; BMI = Body Mass Index; eGFR /= estimated Glomerular Filtration Rate; No cerebrovascular = no cerebrovascular disease at baseline; Cerebrovascular = cerebrovascular disease is present at baseline; Non CVD = no cardiovascular disease at baseline; CVD = Cardiovascular Disease is present at baseline.

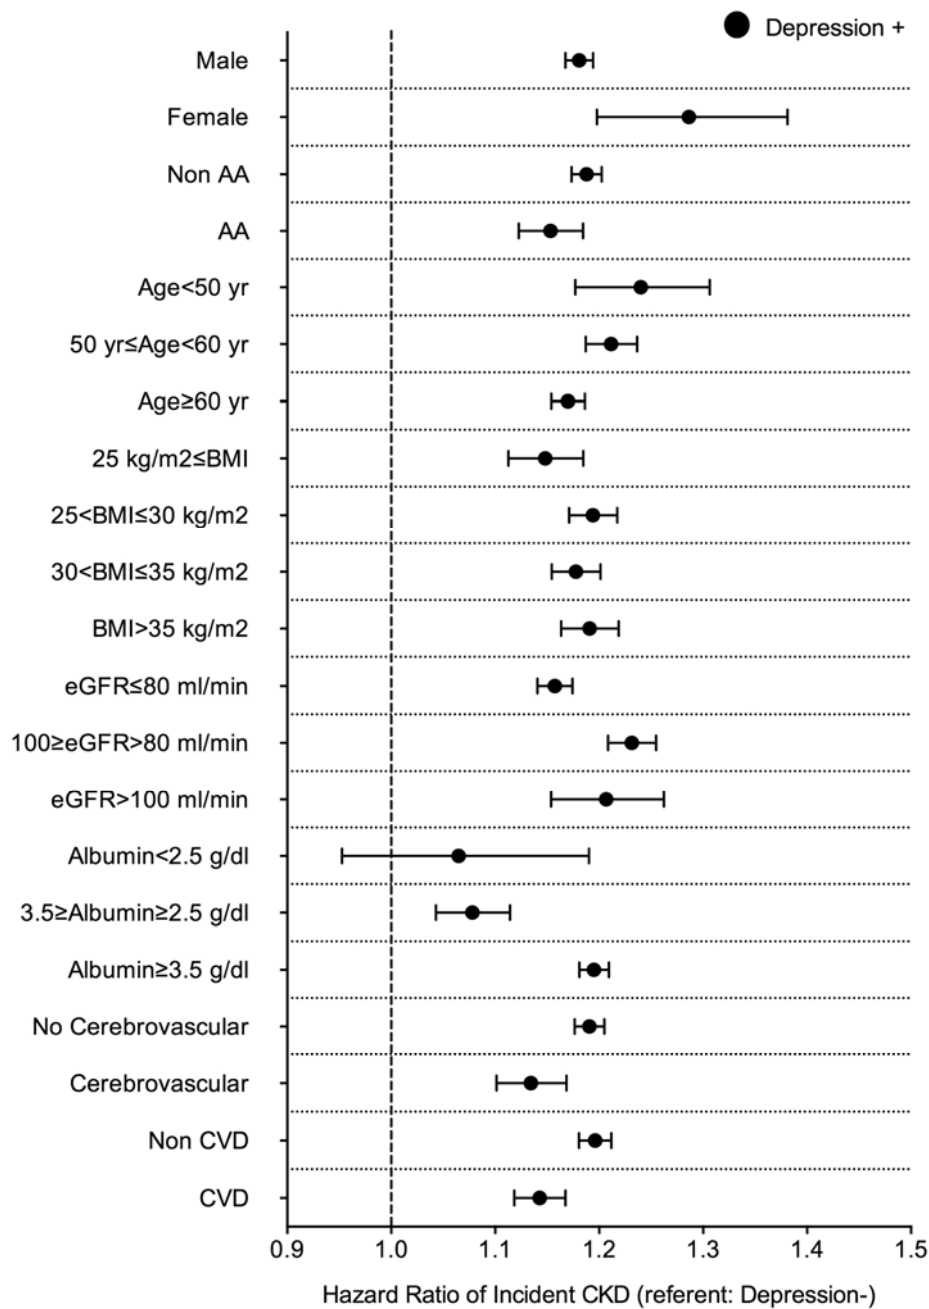

SUPPLEMENTARY DATA

**Supplementary Figure S3.** Multivariable adjusted associations between all-cause mortality and the presence of depression at baseline compared to those without depression in pre-defined subgroups of the study cohort. The models were adjusted for the following covariates: age, gender, race/ethnicity, marital status, baseline eGFR, comorbidities at baseline (hypertension, cardiovascular disease, congestive heart failure, cerebrovascular disease, peripheral vascular disease, lung disease, dementia, rheumatic disease, malignancy, and HIV/AIDS and Post-Traumatic Stress Disorder) and the use of statins or anti-hypertensive medications, body mass index and serum albumin level. Abbreviations: AA = African American; yr = year; BMI = Body Mass Index; eGFR /= estimated Glomerular Filtration Rate; No cerebrovascular = no cerebrovascular disease at baseline; Cerebrovascular = cerebrovascular disease is present at baseline; Non CVD = no cardiovascular disease at baseline; CVD = Cardiovascular Disease is present at baseline.

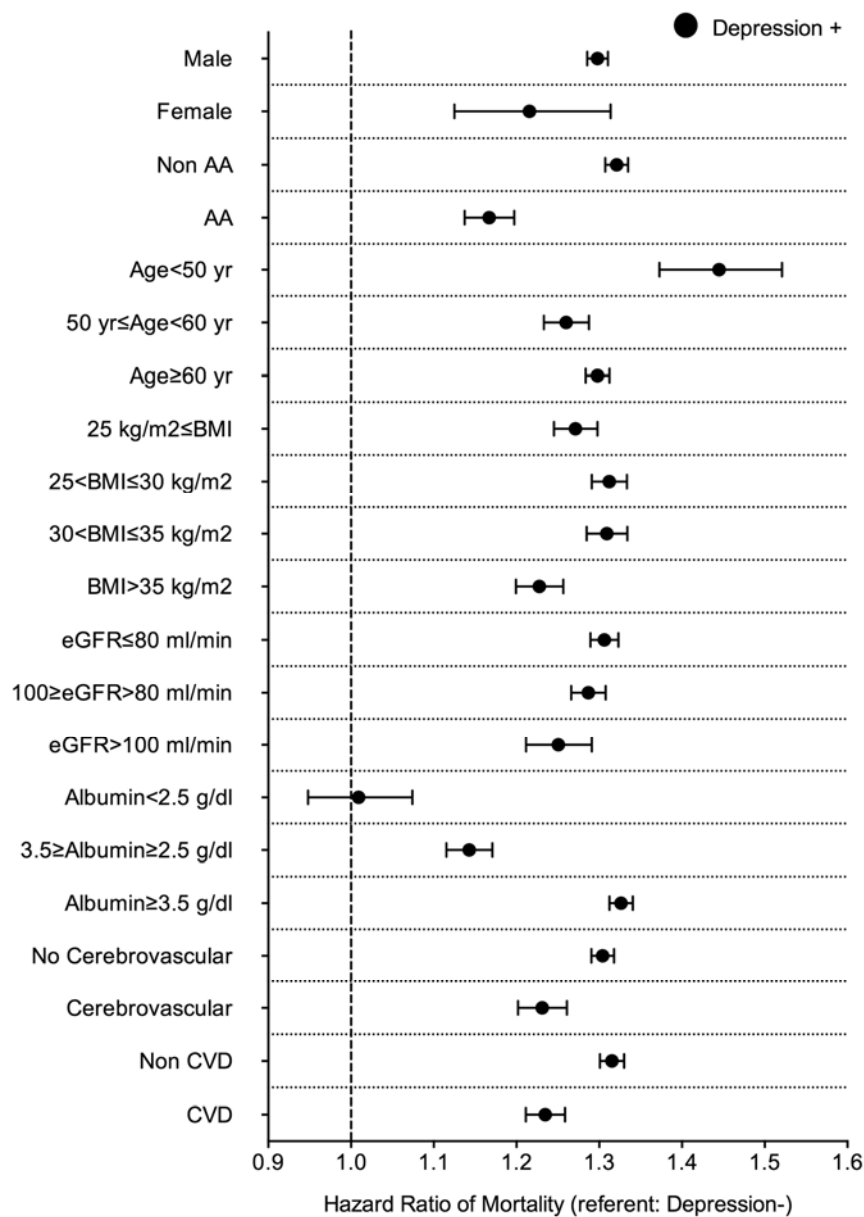

Supplement: dc160048supplementarydata.pdf [file dc160048supplementarydata.pdf]
